# Supplementary material for: Multicomponent Lattice Boltzmann Simulations of Gas Transport in a Coal Reservoir with Dynamic Adsorption
Source: Hindawi journal article supplement (doi:10.1155/2018/5169010), 2018-07-12
Supplement: f1 [file 5169010.f1.pdf]

## Supplementary Material

1. This program is a 2D Generalized Lattice Boltzmann model using a double distribution function to simulate Gas Transport in Coal Reservoir.
2. The whole project is composed of 1.par and GLBM.f90.
3. '1.par' is a header file, where some common blocks are defined, all the subroutines are integrated into the 'GLBM.f90', where 'subroutine FlowField' is employed to reconstruct the images of 2D porous media after binarization by the MATLAB, 'subroutine evolution' and 'subroutine diffusion' is implemented to govern the fluid bulk flow and diffusion, respectively, 'subroutine initial' and 'subroutine output' is used to initialize the flow field and record the simulation results, respectively.
4. Before running this project, please create a new sub-folder 'out' under the working directory.
5. In the simulation, all the parameters are dimensionless, and the output data can be dimensionalized using the principle of similitude.

1.par

implicit none

integer kk,i,j,k,a,b

integer,parameter::m=199,n=199

!D2Q9 Weights

real(8),parameter:: w(0:8) = (/4.0d0/9.0d0&  
&,1.0d0/9.0d0,1.0d0/9.0d0,1.0d0/9.0d0,1.0d0/9.0d0&  
&,1.0d0/36.0d0,1.0d0/36.0d0,1.0d0/36.0d0,1.0d0/36.0d0/)

!D2Q9 Directions

integer,parameter:: cx(0:8)=(/0,1,0,-1,0,1,-1,-1/)  
integer,parameter:: cy(0:8)=(/0,0,1,0,-1,1,1,-1/)

!D2Q9 Anti-Directions

integer,parameter:: opposite(0:8) = (/0,3,4,1,2,7,8,5,6/)

!D2Q5 Weights

real(8),parameter:: wg(0:4) = (/1.0d0/3.0d0&  
&,1.0d0/6.0d0,1.0d0/6.0d0,1.0d0/6.0d0,1.0d0/6.0d0/)

!D2Q5 Directions

integer,parameter:: cgx(0:4)=(/0,1,0,-1,0/)

```
integer,parameter:: cgy(0:4)=(/0,0,1,0,-1/)
```

```
character*64 time,filename
```

```
real*8 dx,dy,dt,rho0,detap,Gx,Gy,tauf,niu,niue,u0(0:n),po_s,po_f
real*8 umax,c_kc,Fpo(0:m,0:n),dp,perm(0:m,0:n),time_begin,time_end,rhow,rhoe
real*8 u(0:m,0:n),v(0:m,0:n),rho(0:m,0:n),f(0:8,0:m,0:n),feq(0:8,0:m,0:n)
real*8 Da,J0,Re,aa,bb,uc,poro(0:m,0:n),Field(0:m,0:n),Field0(0:m,0:n)
real*8 g(0:4,0:m,0:n),geq(0:4,0:m,0:n),Cs(0:m,0:n),Cs_in(0:m,0:n),Nt(0:m,0:n)
real*8 ka,kd,Nm,N0,taug,taus,Ds,Dsp,c_in,Cs_0,Rs(0:m,0:n)
```

```
integer,parameter:: fluid=0,insolid=1,wall=2,corner=3,swall=4,inlet=10,outlet=11
```

```
common/C1/dx,dy,dt,rho0,detap,Gx,Gy,tauf,niu,niue,u0,umax,c_kc,Fpo,dp,perm
common/C2/time,filename,Field,Field0,Rs,time_begin,time_end
common/C3/u,v,rho,f,feq,Da,J0,Re,aa,bb,uc,poro,rhow,rhoe,po_s,po_f
common/C4/g,geq,Cs,Cs_in,Nt,ka,kd,Nm,N0,taug,taus,Ds,Dsp,c_in,Cs_0
```

```
program GLBM
```

```
include '1.par'
```

```
real*8 rr,temp
```

```
! //check the picture
```

```
call FlowField
```

```
open(111,file='image1.dat')
do j=0,n
write(111,*)(Field(i,j),i=0,m)
end do
close(111)
```

```
! //lattice parameters
```

```
dx=1.d0
```

```
dy=dx
```

```
dt=1.d0
```

```
! //macro parameters
```

```
rho0=1.00860448645776d0
```

```
tauf=0.8d0
```

```
niu=(tauf-0.5d0)*dt/3.0d0
```

```
! //The characteristic constant
```

```
!po is porosity of the porous media
```

```
po_s=0.05d0
```

```
po_f=1.0d0
```

```
!dp is the diameter of the solid particle.
```

```
dp=43.2852415859745d0
```

```
!J0=niue/niu
```

```
J0=1.d0
```

```
niue=niu*J0
```

```
!Gx,Gy is the component of body force
```

```
Gx=0.0
```

```
Gy=0.0
```

```
!rhow,rhoe is the density at inlet and outlet,respectively.
```

```
rhow=1.00860464783447d0
```

```
rhoe=rho0
```

```
detap=(rhow-rhoe)/(m+1)
```

```
! //parameters for diffusion
```

```
!constant concentration at inlet
```

```
c_in=0.1d0
```

```
!initial concentration in the field
```

```
Cs_0=0.0
```

```
!adsorption and desorption constant
```

```
ka=0.0519535824329524d0
```

```
kd=0.015194244719982d0
```

```
Nm=3.0
```

```
N0=0.0
```

```
!diffusivity coefficient
```

```
Ds=2.d0
```

```
Dsp=po_s*1.0/30
```

```
taug=3.0d0*Ds+0.5
```

```
taus=3.0d0*Dsp+0.5
```

```
!-----
```

```
call initial
```

```
write(*,*) '-----New Simulation-----'
```

```
write(*,*) 'D2Q9 LBM for gas flow at REV scale@pengzhgg'
```

```
write(*,*) 'lx=',m+1,'ly=',n+1
```

```
write(*,*) 'dx=',dx,'dy=',dy
```

```
write(*,*) 'dt=',dt,'tauf=',tauf,'niu=',niu
```

```
call CPU_TIME(time_begin)
```

```
! //main loop
```

```
do kk=1,1000000
```

```
call evolution
```

```
call diffusion
```

```
if(mod(kk,10000)==0) then
```

```
! call error_judge
```

```

print *, '=====
print *, '====',kk,'=====
print *, '=====
print *, 'rho=',',',rho(0,n/2),',',rho(m/2,n/2),',',rho(m,n/2)
print *, 'u='   ',',u(0,n/2),',',u(m/2,n/2),',',u(m,n/2)
print *, 'v='   ',',v(0,n/2),',',v(m/2,n/2),',',v(m,n/2)
print *, 'Cs='  ',',Cs(0,n/2),',',Cs(m/2,n/2),',',Cs(m,n/2)
end if

```

```

if(mod(kk,10000)==0.or.kk==1)then

```

```

    write(time,*)kk

```

```

    call output

```

```

end if

```

```

end do

```

```

    call CPU_TIME(time_end)

```

```

    print *, '----- End -----'

```

```

    print *, 'total time=',time_end-time_begin,'seconds'&
    &,(time_end-time_begin)/3600,'hour',kk

```

```

end program GLBM

```

```

subroutine FlowField

```

```

    include'l.par'

```

```

integer ip,jp

```

```

    open(12,file='image.dat')

```

```

    do j=n,0,-1

```

```

        read(12,*)(Field(i,j),i=0,m)

```

```

    end do

```

```

    close(12)

```

```

    do j=1,n-1

```

```

    if(Field(0,j)==fluid)then

```

```

        Field(0,j)=inlet

```

```

    end if

```

```

    if(Field(m,j)==fluid)then

```

```

        Field(m,j)=outlet

```

```

    end if

```

```

    end do

```

```

    do i=0,m

```

```

    if(Field(i,0)==fluid)then

```

```

        Field(i,0)=swall

```

```

    end if

```

```

    if(Field(i,n)==fluid)then

```

```

    Field(i,n)=swall
end if
end do

do i=0,m
do j=0,n
Field0(i,j)=Field(i,j)
end do
end do

do i=0,m
do j=0,n

!identify the solid wall
if(Field0(i,j)==insolid)then
do a=1,4
ip=i+cx(a)
jp=j+cy(a)
if(ip>=0.and.ip<=m.and.jp>=0.and.jp<=n)then
if(Field0(ip,jp)==fluid)then
Field(i,j)=wall
end if
if(Field(ip,jp)==inlet.or.Field(ip,jp)==outlet)then
Field(i,j)=wall
end if
if(Field(ip,jp)==swall)then
Field(i,j)=corner
end if
end if
end do
end if
end do

do i=0,m
do j=0,n
if(Field(i,j)==insolid)then

!identify the concave corner
if(Field(i+1,j)==wall.and.Field(i,j+1)==wall)then
if(Field(i+1,j+1)==fluid)then
Field(i,j)=corner
end if
end if
if(Field(i-1,j)==wall.and.Field(i,j+1)==wall)then
if(Field(i-1,j+1)==fluid)then

```

```

    Field(i,j)=corner
end if
end if
if(Field(i-1,j)==wall.and.Field(i,j-1)==wall)then
if(Field(i-1,j-1)==fluid)then
    Field(i,j)=corner
end if
end if
if(Field(i+1,j)==wall.and.Field(i,j-1)==wall)then
if(Field(i+1,j-1)==fluid)then
    Field(i,j)=corner
end if
end if
end if

```

```

!identify the convex corner
if(Field(i,j)==wall)then
if(Field(i+1,j)==wall.and.Field(i,j+1)==wall)then
if(Field(i-1,j-1)==fluid)then
    Field(i,j)=corner
end if
end if
if(Field(i-1,j)==wall.and.Field(i,j+1)==wall)then
if(Field(i+1,j-1)==fluid)then
    Field(i,j)=corner
end if
end if
if(Field(i-1,j)==wall.and.Field(i,j-1)==wall)then
if(Field(i+1,j+1)==fluid)then
    Field(i,j)=corner
end if
end if
if(Field(i+1,j)==wall.and.Field(i,j-1)==wall)then
if(Field(i-1,j+1)==fluid)then
    Field(i,j)=corner
end if
end if
end if
    end do
    end do
end

```

```

subroutine initial
    include '1.par'

```

```

real*8 uu,eu

```

```

do i=0,m
do j=0,n
u(i,j)=0.0
v(i,j)=0.0
rho(i,j)=rho0
end do
end do

```

!identify the free flow region and porous media by porosity

```

do i=0,m
do j=0,n
if(Field(i,j)==insolid.or.Field(i,j)==corner)then
poro(i,j)=po_s
else
poro(i,j)=po_f
end if

```

!Fpo is the geometric function.

```

perm(i,j)=poro(i,j)*(poro(i,j)*dp)**2/(150*(1.0-poro(i,j))**2)
Fpo(i,j)=1.75d0/(dsqrt(150.d0*poro(i,j))*poro(i,j))
end do
end do

```

! //initialize the velocity field

```

do i=0,m
do j=0,n
uu=u(i,j)*u(i,j)+v(i,j)*v(i,j)
do a=0,8
eu=cx(a)*u(i,j)+cy(a)*v(i,j)
feq(a,i,j)=rho(i,j)*w(a)*(1.0+3.0*eu+4.50*eu*eu/poro(i,j)-1.50*uu/poro(i,j))
f(a,i,j)=feq(a,i,j)
end do
end do
end do

```

! //initialize the concentration field

```

do i=0,m
do j=0,n
if(Field(i,j)==insolid.or.Field(i,j)==corner.or.Field(i,j)==wall)Nt(i,j)=N0
do b=0,4
if(Field(i,j)==insolid.or.Field(i,j)==corner.or.Field(i,j)==wall)then
g(b,i,j)=wg(b)*Cs_0
else
g(b,i,j)=0.0d0
end if
if(i.eq.0) g(b,i,j)=wg(b)*c_in

```

```

        end do
        Cs_in(i,j)=0.d0
        end do
        end do
end

subroutine evolution
    include'l.par'

integer is,js
real*8 uu,eu,absu,Fx,Fy,force1,force2,force(0:8),uw,ue
real*8 c0,c1,sumu,sumv,sumf,absutmep,utemp,fem(0:8),feq1(0:8,0:m,0:n)
real*8 utemp(0:m,0:n),vtemp(0:m,0:n),ftemp(0:8,0:m,0:n)

        do j=0,n
        do i=0,m
        sumf=0.0
        do a=0,8
        sumf=sumf+f(a,i,j)
        end do
        rho(i,j)=sumf
        end do
        end do

c0=0.5*(1.0+0.5*dt*poro(i,j)*niu/perm(i,j))
c1=0.5*dt*poro(i,j)*Fpo(i,j)/dsqrt(perm(i,j))

        do i=0,m
        do j=0,n
        sumu=0.0
        sumv=0.0
        do a=0,8
        sumu=sumu+f(a,i,j)*cx(a)+0.5*dt*poro(i,j)*rho(i,j)*Gx
        sumv=sumv+f(a,i,j)*cy(a)+0.5*dt*poro(i,j)*rho(i,j)*Gy
        end do
        utemp(i,j)=sumu/rho(i,j)
        vtemp(i,j)=sumv/rho(i,j)

        absutmep=dsqrt(utemp(i,j)*utemp(i,j)+vtemp(i,j)*vtemp(i,j))
        uvtemp=c0+dsqrt(c0**2+c1*absutmep)
        u(i,j)=utemp(i,j)/uvtemp
        v(i,j)=vtemp(i,j)/uvtemp
        end do
        end do

! //collision

```

```

do i=0,m
do j=0,n
uu=u(i,j)*u(i,j)+v(i,j)*v(i,j)
absu=dsqrt(uu)
!F's x and y component, respectively.
Fx=-poro(i,j)*niu/perm(i,j)*u(i,j)-poro(i,j)*Fpo(i,j)*absu*u(i,j)/dsqrt(perm(i,j))+poro(i,j)*Gx
Fy=-poro(i,j)*niu/perm(i,j)*v(i,j)-poro(i,j)*Fpo(i,j)*absu*v(i,j)/dsqrt(perm(i,j))+poro(i,j)*Gy
do a=0,8
eu=cx(a)*u(i,j)+cy(a)*v(i,j)
feq(a,i,j)=rho(i,j)*w(a)*(1.0+3.0*eu+4.50*eu*eu/poro(i,j)-1.50*uu/poro(i,j))
!Guo's force scheme
force1=3.*(cx(a)-u(i,j)/poro(i,j))*Fx+3.*(cy(a)-v(i,j)/poro(i,j))*Fy
force2=9.*eu*(cx(a)*Fx+cy(a)*Fy)/poro(i,j)
!Fi
force(a)=(1.-1./(2.*tauf))*rho(i,j)*w(a)*(force1+force2)
f(a,i,j)=f(a,i,j)+(feq(a,i,j)-f(a,i,j))/tauf+dt*force(a)
end do
end do
end do

! //steaming
ftemp=f

do a=1,8
do i=0,m
do j=0,n
is=i-cx(a)
js=j-cy(a)
if(is>=0.and.is<=m.and.js>=0.and.js<=n)then
f(a,i,j)=ftemp(a,is,js)
end if
end do
end do
end do

! //inlet and outlet
!periodic boundary
! do j=0,n
! f(1,0,j)=f(1,m-1,j)
! f(5,0,j)=f(5,m-1,j)
! f(8,0,j)=f(8,m-1,j)
! f(3,m,j)=f(3,1,j)
! f(6,m,j)=f(6,1,j)
! f(7,m,j)=f(7,1,j)
! end do

```

!pressure differece boundary

```
do i=0,m
  do j=0,n
    if(Field(i,j)==inlet)then
      uw=1-(f(0,0,j)+f(2,0,j)+f(4,0,j)+2*(f(3,0,j)+f(6,0,j)+f(7,0,j)))/rhow
      f(1,0,j)=f(3,0,j)+2.0/3.0*rhow*uw
      f(5,0,j)=f(7,0,j)-0.5*(f(2,0,j)-f(4,0,j))+1.0/6.0*rhow*uw
      f(8,0,j)=f(6,0,j)+0.5*(f(2,0,j)-f(4,0,j))+1.0/6.0*rhow*uw
    end if
    if(Field(i,j)==outlet)then
      ue=-1+(f(0,m,j)+f(2,m,j)+f(4,m,j)+2*(f(1,m,j)+f(5,m,j)+f(8,m,j)))/rhoe
      f(3,m,j)=f(1,m,j)-2.0/3.0*rhoe*ue
      f(6,m,j)=f(8,m,j)-0.5*(f(2,m,j)-f(4,m,j))-1.0/6.0*rhoe*ue
      f(7,m,j)=f(5,m,j)+0.5*(f(2,m,j)-f(4,m,j))-1.0/6.0*rhoe*ue
    end if
  end do
end do
```

! //solid wall

```
do i=0,m
  f(4,i,n)=f(2,i,n)
  f(7,i,n)=f(5,i,n)
  f(8,i,n)=f(6,i,n)
  f(2,i,0)=f(4,i,0)
  f(5,i,0)=f(7,i,0)
  f(6,i,0)=f(8,i,0)
end do
end
```

subroutine diffusion

```
include'1.par'
real*8 eu,sumg
```

```
do i=0,m
  do j=0,n
    sumg=0.0
    do b=0,4
      sumg=sumg+g(b,i,j)
    end do
    Cs(i,j)=sumg
  end do
end do
```

```
do i=0,m
  do j=1,n-1
```

```
if(Field(i,j)==insolid.or.Field(i,j)==corner.or.Field(i,j)==wall)then
```

```

Rs(i,j)=ka*Cs(i,j)*(Nm-Nt(i,j))-kd*Nt(i,j)
Cs_in(i,j)=Cs(i,j)
end if
end do
end do

! //collision
do i=0,m
do j=0,n
do b=0,4
eu=cgx(b)*u(i,j)+cgy(b)*v(i,j)
geq(b,i,j)=Cs(i,j)*wg(b)*(1.0+3.0*eu)
if(Field(i,j)==insolid.or.Field(i,j)==corner.or.Field(i,j)==wall)then
g(b,i,j)=g(b,i,j)+(geq(b,i,j)-g(b,i,j))/taus-Rs(i,j)*wg(b)
else
g(b,i,j)=g(b,i,j)+(geq(b,i,j)-g(b,i,j))/taug
end if
end do
end do
end do

! //steaming
do j=0,n
do i=1,m
g(1,m-i,j)=g(1,m-i-1,j)
g(2,i-1,j)=g(2,i,j)
end do
end do
do i=0,m
do j=1,n
g(3,i,n-j)=g(3,i,n-j-1)
g(4,i,j-1)=g(4,i,j)
end do
end do

! //boundary condition

do j=1,n-1
g(1,0,j)=c_in/3.0-g(2,0,j)
g(3,0,j)=c_in/3.0-g(4,0,j)
end do

do j=1,n-1
g(0,m,j)=g(0,m-1,j)
g(1,m,j)=g(1,m-1,j)
g(2,m,j)=g(2,m-1,j)

```

```

g(3,m,j)=g(3,m-1,j)
g(4,m,j)=g(4,m-1,j)
end do

```

```

do i=0,m
g(0,i,n)=g(0,i,n-1)
g(1,i,n)=g(1,i,n-1)
g(2,i,n)=g(2,i,n-1)
g(3,i,n)=g(3,i,n-1)
g(4,i,n)=g(4,i,n-1)
end do

```

```

do i=0,m
g(0,i,0)=g(0,i,1)
g(1,i,0)=g(1,i,1)
g(2,i,0)=g(2,i,1)
g(3,i,0)=g(3,i,1)
g(4,i,0)=g(4,i,1)
end do

```

```

! //Adsorption/Desorption

```

```

do i=0,m
do j=0,n
if(Field(i,j)==insolid.or.Field(i,j)==corner.or.Field(i,j)==wall)then
Nt(i,j)=Nt(i,j)+ka*Cs(i,j)*(Nm-Nt(i,j))-kd*Nt(i,j)
end if
if(Nt(i,j).lt.0)then
Nt(i,j)=0.0
end if
end do
end do
end

```

```

subroutine output
include '1.par'

```

```

filename="out/2D"//trim(adjustl(time))//".dat"

```

```

open(2,file=filename)

```

```

! _____
write(2,*)"VARIABLES =X, Y, U, V, rho, Cs, Cs_in, Nt"
write(2,*)"ZONE ", "I=",m+1, "J=",n+1, ", ", "F=BLOCK"
do j=0,n
write(2,*)(i,i=0,m)
end do

```

```
do j=0,n
write(2,*)(j,i=0,m)
end do
do j=0,n
write(2,*)(u(i,j),i=0,m)
end do
do j=0,n
write(2,*)(v(i,j),i=0,m)
end do
do j=0,n
write(2,*)(rho(i,j),i=0,m)
end do
do j=0,n
write(2,*)(Cs(i,j),i=0,m)
end do
do j=0,n
write(2,*)(Cs_in(i,j),i=0,m)
end do
do j=0,n
write(2,*)(Nt(i,j),i=0,m)
end do
end
```
